# Supplementary material for: Comparative Analysis of Shapley Values Enhances Transcriptomics Insights across Some Common Uterine Pathologies
Source: Preprints.org preprint supplement (doi:10.20944/preprints202404.0931.v1), 2024-04-15
Supplement: Supplementary file 1 [file supplementary]

## Sheet: Overview
	Dataset	Number of samples analyzed	Description of samples	DEGs			Phenotype group	GEO link
				Welch test	CASH
					0.01	0.05
	GSE36389	16	10 endometrial cancer, 6 control	0	38	125	Endometrial cancer	https://www.ncbi.nlm.nih.gov/geo/query/acc.cgi?acc=GSE36389
	GSE63678	11	6 endometrial carcinoma, 5 control	0	496	934	Endometrial cancer	https://www.ncbi.nlm.nih.gov/geo/query/acc.cgi?acc=GSE63678
	GSE7846	9	4 endometriosis, 5 control	0	74	1069	Endometriosis	https://www.ncbi.nlm.nih.gov/geo/query/acc.cgi?acc=GSE7846
	GSE17504	11	5 endometriosis, 6 control	0	17	84	Endometriosis	https://www.ncbi.nlm.nih.gov/geo/query/acc.cgi?acc=GSE17504
	GSE12814	14	5 leiomyoma, 9 control	0	21	84	Uterine leiomyoma	https://www.ncbi.nlm.nih.gov/geo/query/acc.cgi?acc=GSE12814
	GSE23112	7	3 leiomyoma, 4 control	0	7	38	Uterine leiomyoma	https://www.ncbi.nlm.nih.gov/geo/query/acc.cgi?acc=GSE23112
		68

## Sheet: GSE36389
Welch's t-test results				CASh 0.01 results				CASh 0.05 results
all	up	down		all	up	down		all	up	down
0	0	0		201301_s_at	201301_s_at	201688_s_at		200666_s_at	200666_s_at	117_at
				201736_s_at	201736_s_at	202787_s_at		201278_at	201278_at	202935_s_at
				201901_s_at	201901_s_at	204007_at		201301_s_at	201301_s_at	203889_at
				202768_at	202768_at	204225_at		201302_at	201302_at	204541_at
				202826_at	202826_at	206429_at		201736_s_at	201736_s_at	204654_s_at
				202908_at	202908_at	207921_x_at		201783_s_at	201783_s_at	204955_at
				204345_at	204345_at	208365_s_at		201809_s_at	201809_s_at	204989_s_at
				204359_at	204359_at	209242_at		201842_s_at	201842_s_at	205006_s_at
				208308_s_at	208308_s_at	209785_s_at		201941_at	201941_at	205500_at
				209568_s_at	209568_s_at	209872_s_at		202005_at	202005_at	205713_s_at
				209678_s_at	209678_s_at	210785_s_at		202048_s_at	202048_s_at	206304_at
				210201_x_at	210201_x_at	212570_at		202071_at	202071_at	206353_at
				211709_s_at	211709_s_at	212865_s_at		202688_at	202688_at	206420_at
				213313_at	213313_at	214951_at		202826_at	202826_at	206637_at
				214238_at	214238_at	218295_s_at		202838_at	202838_at	206878_at
				214439_x_at	214439_x_at	220174_at		202908_at	202908_at	206890_at
				214836_x_at	214836_x_at	222171_s_at		202931_x_at	202931_x_at	207059_at
				215089_s_at	215089_s_at			202947_s_at	202947_s_at	207869_s_at
				217022_s_at	217022_s_at			203298_s_at	203298_s_at	207907_at
				219478_at	219478_at			203325_s_at	203325_s_at	208130_s_at
				62987_r_at	62987_r_at			203344_s_at	203344_s_at	208153_s_at
				201688_s_at				204041_at	204041_at	208470_s_at
				202787_s_at				204345_at	204345_at	209270_at
				204007_at				204359_at	204359_at	209872_s_at
				204225_at				204442_x_at	204442_x_at	210380_s_at
				206429_at				205854_at	205854_at	210581_x_at
				207921_x_at				206385_s_at	206385_s_at	211094_s_at
				208365_s_at				207016_s_at	207016_s_at	211621_at
				209242_at				208818_s_at	208818_s_at	211641_x_at
				209785_s_at				208850_s_at	208850_s_at	211700_s_at
				209872_s_at				208872_s_at	208872_s_at	211798_x_at
				210785_s_at				208986_at	208986_at	211865_s_at
				212570_at				209016_s_at	209016_s_at	213519_s_at
				212865_s_at				209530_at	209530_at	213644_at
				214951_at				209568_s_at	209568_s_at	213960_at
				218295_s_at				209708_at	209708_at	213987_s_at
				220174_at				209710_at	209710_at	214522_x_at
				222171_s_at				209815_at	209815_at	215209_at
								209875_s_at	209875_s_at	215651_at
								210201_x_at	210201_x_at	215721_at
								210827_s_at	210827_s_at	215765_at
								212576_at	212576_at	216327_s_at
								212796_s_at	212796_s_at	216557_x_at
								213131_at	213131_at	216627_s_at
								213509_x_at	213509_x_at	217525_at
								213627_at	213627_at	218694_at
								213869_x_at	213869_x_at	218703_at
								214238_at	214238_at	219170_at
								214439_x_at	214439_x_at	219427_at
								214501_s_at	214501_s_at	219615_s_at
								214686_at	214686_at	220512_at
								214836_x_at	214836_x_at	221933_at
								215089_s_at	215089_s_at	222171_s_at
								215223_s_at	215223_s_at	222307_at
								216199_s_at	216199_s_at	222376_at
								216484_x_at	216484_x_at
								217022_s_at	217022_s_at
								217221_x_at	217221_x_at
								217286_s_at	217286_s_at
								217946_s_at	217946_s_at
								218192_at	218192_at
								218407_x_at	218407_x_at
								218648_at	218648_at
								219197_s_at	219197_s_at
								219478_at	219478_at
								219791_s_at	219791_s_at
								220911_s_at	220911_s_at
								221002_s_at	221002_s_at
								221261_x_at	221261_x_at
								396_f_at	396_f_at
								117_at
								202935_s_at
								203889_at
								204541_at
								204654_s_at
								204955_at
								204989_s_at
								205006_s_at
								205500_at
								205713_s_at
								206304_at
								206353_at
								206420_at
								206637_at
								206878_at
								206890_at
								207059_at
								207869_s_at
								207907_at
								208130_s_at
								208153_s_at
								208470_s_at
								209270_at
								209872_s_at
								210380_s_at
								210581_x_at
								211094_s_at
								211621_at
								211641_x_at
								211700_s_at
								211798_x_at
								211865_s_at
								213519_s_at
								213644_at
								213960_at
								213987_s_at
								214522_x_at
								215209_at
								215651_at
								215721_at
								215765_at
								216327_s_at
								216557_x_at
								216627_s_at
								217525_at
								218694_at
								218703_at
								219170_at
								219427_at
								219615_s_at
								220512_at
								221933_at
								222171_s_at
								222307_at
								222376_at

## Sheet: GSE63678
Welch's t-test results				CASh 0.01 results				CASh 0.05 results
all	up	down		all	up	down		all	up	down
0	0	0		200075_s_at	200075_s_at	1316_at		200055_at	200055_at	201291_s_at
				200078_s_at	200078_s_at	200831_s_at		200075_s_at	200075_s_at	201292_at
				200660_at	200660_at	201291_s_at		200078_s_at	200078_s_at	201372_s_at
				200669_s_at	200669_s_at	201292_at		200598_s_at	200598_s_at	201467_s_at
				200682_s_at	200682_s_at	201467_s_at		200606_at	200606_at	201557_at
				200700_s_at	200700_s_at	202095_s_at		200616_s_at	200616_s_at	201562_s_at
				200706_s_at	200706_s_at	202206_at		200643_at	200643_at	202094_at
				200729_s_at	200729_s_at	202580_x_at		200656_s_at	200656_s_at	202095_s_at
				200747_s_at	200747_s_at	202652_at		200660_at	200660_at	202195_s_at
				200832_s_at	200832_s_at	202705_at		200669_s_at	200669_s_at	202206_at
				200887_s_at	200887_s_at	202712_s_at		200670_at	200670_at	202410_x_at
				200911_s_at	200911_s_at	202819_s_at		200682_s_at	200682_s_at	202580_x_at
				200920_s_at	200920_s_at	202870_s_at		200694_s_at	200694_s_at	202652_at
				200942_s_at	200942_s_at	203141_s_at		200698_at	200698_at	202695_s_at
				201012_at	201012_at	203145_at		200700_s_at	200700_s_at	202712_s_at
				201013_s_at	201013_s_at	203214_x_at		200706_s_at	200706_s_at	203214_x_at
				201042_at	201042_at	203276_at		200708_at	200708_at	203276_at
				201061_s_at	201061_s_at	203328_x_at		200729_s_at	200729_s_at	203362_s_at
				201088_at	201088_at	203358_s_at		200737_at	200737_at	203418_at
				201096_s_at	201096_s_at	203362_s_at		200747_s_at	200747_s_at	203641_s_at
				201098_at	201098_at	203379_at		200758_s_at	200758_s_at	203672_x_at
				201123_s_at	201123_s_at	203418_at		200816_s_at	200816_s_at	203736_s_at
				201133_s_at	201133_s_at	203672_x_at		200820_at	200820_at	203755_at
				201135_at	201135_at	203755_at		200828_s_at	200828_s_at	203764_at
				201189_s_at	201189_s_at	203764_at		200832_s_at	200832_s_at	203779_s_at
				201193_at	201193_at	203779_s_at		200846_s_at	200846_s_at	203805_s_at
				201202_at	201202_at	203806_s_at		200887_s_at	200887_s_at	203806_s_at
				201274_at	201274_at	203968_s_at		200916_at	200916_at	203861_s_at
				201317_s_at	201317_s_at	204033_at		200993_at	200993_at	203968_s_at
				201319_at	201319_at	204077_x_at		201012_at	201012_at	203969_at
				201327_s_at	201327_s_at	204092_s_at		201013_s_at	201013_s_at	204033_at
				201339_s_at	201339_s_at	204126_s_at		201042_at	201042_at	204077_x_at
				201400_at	201400_at	204134_at		201088_at	201088_at	204092_s_at
				201413_at	201413_at	204146_at		201096_s_at	201096_s_at	204126_s_at
				201459_at	201459_at	204154_at		201098_at	201098_at	204134_at
				201524_x_at	201524_x_at	204162_at		201123_s_at	201123_s_at	204154_at
				201535_at	201535_at	204240_s_at		201128_s_at	201128_s_at	204162_at
				201561_s_at	201561_s_at	204318_s_at		201133_s_at	201133_s_at	204240_s_at
				201576_s_at	201576_s_at	204343_at		201148_s_at	201148_s_at	204318_s_at
				201577_at	201577_at	204407_at		201174_s_at	201174_s_at	204407_at
				201596_x_at	201596_x_at	204422_s_at		201189_s_at	201189_s_at	204421_s_at
				201664_at	201664_at	204444_at		201193_at	201193_at	204422_s_at
				201672_s_at	201672_s_at	204493_at		201202_at	201202_at	204437_s_at
				201690_s_at	201690_s_at	204580_at		201232_s_at	201232_s_at	204444_at
				201698_s_at	201698_s_at	204641_at		201263_at	201263_at	204541_at
				201810_s_at	201810_s_at	204649_at		201270_x_at	201270_x_at	204549_at
				201811_x_at	201811_x_at	204653_at		201274_at	201274_at	204558_at
				201842_s_at	201842_s_at	204695_at		201275_at	201275_at	204580_at
				201900_s_at	201900_s_at	204702_s_at		201286_at	201286_at	204641_at
				202001_s_at	202001_s_at	204738_s_at		201300_s_at	201300_s_at	204649_at
				202087_s_at	202087_s_at	204768_s_at		201327_s_at	201327_s_at	204695_at
				202123_s_at	202123_s_at	204802_at		201339_s_at	201339_s_at	204702_s_at
				202154_x_at	202154_x_at	204803_s_at		201341_at	201341_at	204709_s_at
				202172_at	202172_at	204811_s_at		201343_at	201343_at	204717_s_at
				202227_s_at	202227_s_at	204817_at		201369_s_at	201369_s_at	204738_s_at
				202282_at	202282_at	204822_at		201381_x_at	201381_x_at	204751_x_at
				202300_at	202300_at	204824_at		201394_s_at	201394_s_at	204783_at
				202306_at	202306_at	204825_at		201400_at	201400_at	204802_at
				202409_at	202409_at	204845_s_at		201413_at	201413_at	204803_s_at
				202428_x_at	202428_x_at	204850_s_at		201422_at	201422_at	204817_at
				202432_at	202432_at	204851_s_at		201427_s_at	201427_s_at	204822_at
				202436_s_at	202436_s_at	204962_s_at		201472_at	201472_at	204850_s_at
				202440_s_at	202440_s_at	205005_s_at		201485_s_at	201485_s_at	204851_s_at
				202546_at	202546_at	205006_s_at		201498_at	201498_at	204875_s_at
				202553_s_at	202553_s_at	205024_s_at		201527_at	201527_at	204886_at
				202565_s_at	202565_s_at	205034_at		201535_at	201535_at	204887_s_at
				202566_s_at	202566_s_at	205046_at		201540_at	201540_at	204962_s_at
				202636_at	202636_at	205088_at		201561_s_at	201561_s_at	204972_at
				202824_s_at	202824_s_at	205190_at		201563_at	201563_at	205024_s_at
				202836_s_at	202836_s_at	205195_at		201576_s_at	201576_s_at	205034_at
				202854_at	202854_at	205196_s_at		201577_at	201577_at	205046_at
				202941_at	202941_at	205282_at		201621_at	201621_at	205139_s_at
				203300_x_at	203300_x_at	205362_s_at		201650_at	201650_at	205190_at
				203373_at	203373_at	205394_at		201664_at	201664_at	205195_at
				203396_at	203396_at	205433_at		201672_s_at	201672_s_at	205203_at
				203534_at	203534_at	205497_at		201690_s_at	201690_s_at	205239_at
				203538_at	203538_at	205498_at		201740_at	201740_at	205246_at
				203657_s_at	203657_s_at	205518_s_at		201745_at	201745_at	205282_at
				203661_s_at	203661_s_at	205541_s_at		201760_s_at	201760_s_at	205297_s_at
				203662_s_at	203662_s_at	205613_at		201792_at	201792_at	205309_at
				203685_at	203685_at	205733_at		201810_s_at	201810_s_at	205393_s_at
				203780_at	203780_at	205780_at		201839_s_at	201839_s_at	205394_at
				203786_s_at	203786_s_at	205942_s_at		201842_s_at	201842_s_at	205403_at
				203917_at	203917_at	206073_at		201894_s_at	201894_s_at	205428_s_at
				204004_at	204004_at	206088_at		201899_s_at	201899_s_at	205433_at
				204028_s_at	204028_s_at	206142_at		201900_s_at	201900_s_at	205498_at
				204168_at	204168_at	206303_s_at		201954_at	201954_at	205518_s_at
				204170_s_at	204170_s_at	206364_at		201957_at	201957_at	205611_at
				204326_x_at	204326_x_at	206632_s_at		202001_s_at	202001_s_at	205663_at
				204517_at	204517_at	206659_at		202004_x_at	202004_x_at	205688_at
				204686_at	204686_at	206702_at		202041_s_at	202041_s_at	205699_at
				204793_at	204793_at	206722_s_at		202085_at	202085_at	205733_at
				205022_s_at	205022_s_at	206954_at		202087_s_at	202087_s_at	205759_s_at
				205081_at	205081_at	207154_at		202096_s_at	202096_s_at	205767_at
				205483_s_at	205483_s_at	207165_at		202121_s_at	202121_s_at	205768_s_at
				205522_at	205522_at	207357_s_at		202123_s_at	202123_s_at	205769_at
				206012_at	206012_at	207474_at		202154_x_at	202154_x_at	205780_at
				206015_s_at	206015_s_at	207757_at		202172_at	202172_at	205782_at
				206059_at	206059_at	207828_s_at		202177_at	202177_at	205794_s_at
				206067_s_at	206067_s_at	207837_at		202207_at	202207_at	205816_at
				206461_x_at	206461_x_at	208079_s_at		202227_s_at	202227_s_at	205972_at
				206551_x_at	206551_x_at	208102_s_at		202259_s_at	202259_s_at	206023_at
				206874_s_at	206874_s_at	208103_s_at		202282_at	202282_at	206027_at
				207016_s_at	207016_s_at	208395_s_at		202309_at	202309_at	206073_at
				207233_s_at	207233_s_at	208707_at		202334_s_at	202334_s_at	206084_at
				207365_x_at	207365_x_at	208711_s_at		202342_s_at	202342_s_at	206088_at
				207543_s_at	207543_s_at	209243_s_at		202386_s_at	202386_s_at	206090_s_at
				207730_x_at	207730_x_at	209408_at		202395_at	202395_at	206142_at
				207809_s_at	207809_s_at	209426_s_at		202409_at	202409_at	206346_at
				207842_s_at	207842_s_at	209464_at		202428_x_at	202428_x_at	206348_s_at
				208308_s_at	208308_s_at	209626_s_at		202432_at	202432_at	206364_at
				208581_x_at	208581_x_at	209627_s_at		202436_s_at	202436_s_at	206512_at
				208614_s_at	208614_s_at	209639_s_at		202440_s_at	202440_s_at	206558_at
				208623_s_at	208623_s_at	209709_s_at		202447_at	202447_at	206625_at
				208671_at	208671_at	209714_s_at		202450_s_at	202450_s_at	206632_s_at
				208689_s_at	208689_s_at	209981_at		202466_at	202466_at	206661_at
				208716_s_at	208716_s_at	209983_s_at		202484_s_at	202484_s_at	206669_at
				208723_at	208723_at	210052_s_at		202540_s_at	202540_s_at	206670_s_at
				208799_at	208799_at	210073_at		202546_at	202546_at	206671_at
				208910_s_at	208910_s_at	210268_at		202565_s_at	202565_s_at	206721_at
				209008_x_at	209008_x_at	210385_s_at		202566_s_at	202566_s_at	206738_at
				209224_s_at	209224_s_at	210476_s_at		202589_at	202589_at	206767_at
				209242_at	209242_at	210486_at		202636_at	202636_at	206784_at
				209318_x_at	209318_x_at	210559_s_at		202678_at	202678_at	206791_s_at
				209332_s_at	209332_s_at	210571_s_at		202690_s_at	202690_s_at	206954_at
				209348_s_at	209348_s_at	210608_s_at		202704_at	202704_at	207034_s_at
				209389_x_at	209389_x_at	210653_s_at		202732_at	202732_at	207057_at
				209392_at	209392_at	210675_s_at		202743_at	202743_at	207068_at
				209481_at	209481_at	210821_x_at		202748_at	202748_at	207165_at
				209550_at	209550_at	210867_at		202824_s_at	202824_s_at	207223_s_at
				210042_s_at	210042_s_at	210880_s_at		202836_s_at	202836_s_at	207255_at
				210145_at	210145_at	210882_s_at		202854_at	202854_at	207263_x_at
				210372_s_at	210372_s_at	211592_s_at		202887_s_at	202887_s_at	207287_at
				210715_s_at	210715_s_at	211598_x_at		202910_s_at	202910_s_at	207357_s_at
				210839_s_at	210839_s_at	211695_x_at		202941_at	202941_at	207572_at
				211070_x_at	211070_x_at	211776_s_at		203024_s_at	203024_s_at	207623_at
				211456_x_at	211456_x_at	212020_s_at		203041_s_at	203041_s_at	207717_s_at
				211733_x_at	211733_x_at	212021_s_at		203166_at	203166_at	207728_at
				211762_s_at	211762_s_at	212022_s_at		203184_at	203184_at	207757_at
				211998_at	211998_at	212023_s_at		203216_s_at	203216_s_at	207758_at
				212017_at	212017_at	212315_s_at		203232_s_at	203232_s_at	207766_at
				212038_s_at	212038_s_at	212527_at		203259_s_at	203259_s_at	207799_x_at
				212129_at	212129_at	212529_at		203300_x_at	203300_x_at	207837_at
				212143_s_at	212143_s_at	212563_at		203301_s_at	203301_s_at	207850_at
				212153_at	212153_at	212801_at		203373_at	203373_at	207895_at
				212163_at	212163_at	212843_at		203404_at	203404_at	208025_s_at
				212179_at	212179_at	212902_at		203420_at	203420_at	208079_s_at
				212222_at	212222_at	212949_at		203430_at	203430_at	208102_s_at
				212232_at	212232_at	213096_at		203534_at	203534_at	208103_s_at
				212296_at	212296_at	213202_at		203657_s_at	203657_s_at	208107_s_at
				212345_s_at	212345_s_at	213381_at		203661_s_at	203661_s_at	208138_at
				212350_at	212350_at	213412_at		203662_s_at	203662_s_at	208156_x_at
				212449_s_at	212449_s_at	213416_at		203666_at	203666_at	208199_s_at
				212534_at	212534_at	213493_at		203685_at	203685_at	208205_at
				212653_s_at	212653_s_at	213506_at		203688_at	203688_at	208323_s_at
				212692_s_at	212692_s_at	213681_at		203780_at	203780_at	208396_s_at
				212813_at	212813_at	213714_at		203786_s_at	203786_s_at	208492_at
				212859_x_at	212859_x_at	213776_at		203825_at	203825_at	208504_x_at
				212914_at	212914_at	213854_at		203917_at	203917_at	208516_at
				212915_at	212915_at	213936_x_at		204004_at	204004_at	208523_x_at
				212922_s_at	212922_s_at	213946_s_at		204009_s_at	204009_s_at	208558_at
				212982_at	212982_at	214078_at		204041_at	204041_at	208561_at
				213075_at	213075_at	214082_at		204051_s_at	204051_s_at	208790_s_at
				213153_at	213153_at	214205_x_at		204112_s_at	204112_s_at	209133_s_at
				213364_s_at	213364_s_at	214264_s_at		204131_s_at	204131_s_at	209243_s_at
				213400_s_at	213400_s_at	214384_s_at		204142_at	204142_at	209426_s_at
				213476_x_at	213476_x_at	214607_at		204168_at	204168_at	209464_at
				213568_at	213568_at	214697_s_at		204170_s_at	204170_s_at	209470_s_at
				213693_s_at	213693_s_at	214710_s_at		204295_at	204295_at	209569_x_at
				213939_s_at	213939_s_at	214745_at		204326_x_at	204326_x_at	209599_s_at
				214214_s_at	214214_s_at	214915_at		204415_at	204415_at	209612_s_at
				214501_s_at	214501_s_at	214918_at		204464_s_at	204464_s_at	209613_s_at
				214715_x_at	214715_x_at	215044_s_at		204517_at	204517_at	209615_s_at
				214753_at	214753_at	215140_at		204616_at	204616_at	209626_s_at
				215179_x_at	215179_x_at	215162_at		204640_s_at	204640_s_at	209627_s_at
				215380_s_at	215380_s_at	215232_at		204686_at	204686_at	209631_s_at
				215438_x_at	215438_x_at	215255_at		204688_at	204688_at	209639_s_at
				215600_x_at	215600_x_at	215358_x_at		204710_s_at	204710_s_at	209642_at
				216199_s_at	216199_s_at	215375_x_at		204719_at	204719_at	209683_at
				216215_s_at	216215_s_at	215462_at		204745_x_at	204745_x_at	209709_s_at
				216221_s_at	216221_s_at	215471_s_at		204793_at	204793_at	209714_s_at
				216858_x_at	216858_x_at	215474_at		204916_at	204916_at	209763_at
				217165_x_at	217165_x_at	215501_s_at		205022_s_at	205022_s_at	209904_at
				217294_s_at	217294_s_at	215513_at		205081_at	205081_at	209921_at
				217356_s_at	217356_s_at	215521_at		205133_s_at	205133_s_at	209924_at
				217734_s_at	217734_s_at	215555_at		205335_s_at	205335_s_at	209925_at
				217758_s_at	217758_s_at	215592_at		205483_s_at	205483_s_at	209949_at
				217761_at	217761_at	215630_at		205522_at	205522_at	209983_s_at
				217795_s_at	217795_s_at	215683_at		206012_at	206012_at	209993_at
				217832_at	217832_at	215766_at		206015_s_at	206015_s_at	209994_s_at
				217833_at	217833_at	215791_at		206052_s_at	206052_s_at	210007_s_at
				217906_at	217906_at	215811_at		206059_at	206059_at	210021_s_at
				217938_s_at	217938_s_at	215883_at		206067_s_at	206067_s_at	210048_at
				217969_at	217969_at	215900_at		206093_x_at	206093_x_at	210050_at
				218003_s_at	218003_s_at	216081_at		206245_s_at	206245_s_at	210052_s_at
				218160_at	218160_at	216114_at		206453_s_at	206453_s_at	210058_at
				218263_s_at	218263_s_at	216229_x_at		206461_x_at	206461_x_at	210064_s_at
				218312_s_at	218312_s_at	216330_s_at		206481_s_at	206481_s_at	210073_at
				218320_s_at	218320_s_at	216472_at		206638_at	206638_at	210161_at
				218435_at	218435_at	216614_at		206874_s_at	206874_s_at	210162_s_at
				218528_s_at	218528_s_at	216628_at		207016_s_at	207016_s_at	210170_at
				218641_at	218641_at	216638_s_at		207191_s_at	207191_s_at	210187_at
				218648_at	218648_at	216905_s_at		207233_s_at	207233_s_at	210237_at
				218694_at	218694_at	217506_at		207332_s_at	207332_s_at	210253_at
				218966_at	218966_at	217536_x_at		207365_x_at	207365_x_at	210268_at
				219791_s_at	219791_s_at	217631_at		207480_s_at	207480_s_at	210301_at
				220046_s_at	220046_s_at	217659_at		207543_s_at	207543_s_at	210334_x_at
				220272_at	220272_at	218039_at		207730_x_at	207730_x_at	210365_at
				220319_s_at	220319_s_at	218073_s_at		207809_s_at	207809_s_at	210379_s_at
				220948_s_at	220948_s_at	218275_at		207842_s_at	207842_s_at	210405_x_at
				220966_x_at	220966_x_at	218355_at		207843_x_at	207843_x_at	210476_s_at
				221506_s_at	221506_s_at	218362_s_at		207847_s_at	207847_s_at	210486_at
				46256_at	46256_at	218542_at		207922_s_at	207922_s_at	210559_s_at
				1316_at		218585_s_at		208030_s_at	208030_s_at	210571_s_at
				200831_s_at		218662_s_at		208131_s_at	208131_s_at	210608_s_at
				201291_s_at		218663_at		208308_s_at	208308_s_at	210653_s_at
				201292_at		218700_s_at		208581_x_at	208581_x_at	210675_s_at
				201467_s_at		218726_at		208610_s_at	208610_s_at	210714_at
				202095_s_at		218739_at		208614_s_at	208614_s_at	210813_s_at
				202206_at		218755_at		208623_s_at	208623_s_at	210821_x_at
				202580_x_at		218883_s_at		208650_s_at	208650_s_at	210867_at
				202652_at		218981_at		208651_x_at	208651_x_at	210868_s_at
				202705_at		219113_x_at		208654_s_at	208654_s_at	210870_s_at
				202712_s_at		219127_at		208689_s_at	208689_s_at	210880_s_at
				202819_s_at		219148_at		208690_s_at	208690_s_at	210881_s_at
				202870_s_at		219181_at		208696_at	208696_at	210882_s_at
				203141_s_at		219211_at		208723_at	208723_at	210883_x_at
				203145_at		219360_s_at		208734_x_at	208734_x_at	210904_s_at
				203214_x_at		219416_at		208761_s_at	208761_s_at	210956_at
				203276_at		219494_at		208767_s_at	208767_s_at	210990_s_at
				203328_x_at		219510_at		208799_at	208799_at	211105_s_at
				203358_s_at		219544_at		208827_at	208827_at	211130_x_at
				203362_s_at		219545_at		208872_s_at	208872_s_at	211162_x_at
				203379_at		219551_at		208910_s_at	208910_s_at	211279_at
				203418_at		219555_s_at		208922_s_at	208922_s_at	211372_s_at
				203672_x_at		219573_at		208959_s_at	208959_s_at	211374_x_at
				203755_at		219617_at		208998_at	208998_at	211701_s_at
				203764_at		219665_at		209008_x_at	209008_x_at	211708_s_at
				203779_s_at		219685_at		209025_s_at	209025_s_at	211776_s_at
				203806_s_at		219699_at		209042_s_at	209042_s_at	211867_s_at
				203968_s_at		219725_at		209068_at	209068_at	211879_x_at
				204033_at		219785_s_at		209102_s_at	209102_s_at	211899_s_at
				204077_x_at		219787_s_at		209121_x_at	209121_x_at	212020_s_at
				204092_s_at		219836_at		209124_at	209124_at	212021_s_at
				204126_s_at		219855_at		209141_at	209141_at	212022_s_at
				204134_at		219902_at		209200_at	209200_at	212023_s_at
				204146_at		219918_s_at		209230_s_at	209230_s_at	212172_at
				204154_at		219978_s_at		209242_at	209242_at	212415_at
				204162_at		219990_at		209288_s_at	209288_s_at	212527_at
				204240_s_at		220038_at		209295_at	209295_at	212801_at
				204318_s_at		220144_s_at		209318_x_at	209318_x_at	212843_at
				204343_at		220150_s_at		209329_x_at	209329_x_at	212949_at
				204407_at		220161_s_at		209332_s_at	209332_s_at	213096_at
				204422_s_at		220215_at		209335_at	209335_at	213183_s_at
				204444_at		220416_at		209337_at	209337_at	213317_at
				204493_at		220480_at		209340_at	209340_at	213332_at
				204580_at		220483_s_at		209348_s_at	209348_s_at	213339_at
				204641_at		220484_at		209366_x_at	209366_x_at	213381_at
				204649_at		220638_s_at		209389_x_at	209389_x_at	213401_s_at
				204653_at		220651_s_at		209392_at	209392_at	213412_at
				204695_at		220711_at		209476_at	209476_at	213416_at
				204702_s_at		220779_at		209478_at	209478_at	213433_at
				204738_s_at		220898_at		209481_at	209481_at	213438_at
				204768_s_at		220923_s_at		209485_s_at	209485_s_at	213456_at
				204802_at		221234_s_at		209487_at	209487_at	213461_at
				204803_s_at		221272_s_at		209510_at	209510_at	213493_at
				204811_s_at		221413_at		209550_at	209550_at	213506_at
				204817_at		221436_s_at		209596_at	209596_at	213599_at
				204822_at		221520_s_at		209623_at	209623_at	213615_at
				204824_at		221591_s_at		209651_at	209651_at	213714_at
				204825_at		221885_at		209687_at	209687_at	213744_at
				204845_s_at		221901_at		210042_s_at	210042_s_at	213745_at
				204850_s_at		221959_at		210046_s_at	210046_s_at	213854_at
				204851_s_at		222054_at		210105_s_at	210105_s_at	213908_at
				204962_s_at		222141_at		210131_x_at	210131_x_at	213912_at
				205005_s_at		222161_at		210145_at	210145_at	213933_at
				205006_s_at		222193_at		210346_s_at	210346_s_at	213936_x_at
				205024_s_at		222339_x_at		210372_s_at	210372_s_at	213946_s_at
				205034_at		222378_at		210438_x_at	210438_x_at	213960_at
				205046_at		37226_at		210588_x_at	210588_x_at	213974_at
				205088_at		52837_at		210715_s_at	210715_s_at	213992_at
				205190_at		58308_at		210839_s_at	210839_s_at	214053_at
				205195_at		58916_at		210962_s_at	210962_s_at	214058_at
				205196_s_at				211048_s_at	211048_s_at	214063_s_at
				205282_at				211070_x_at	211070_x_at	214071_at
				205362_s_at				211075_s_at	211075_s_at	214078_at
				205394_at				211456_x_at	211456_x_at	214157_at
				205433_at				211474_s_at	211474_s_at	214192_at
				205497_at				211733_x_at	211733_x_at	214294_at
				205498_at				211759_x_at	211759_x_at	214303_x_at
				205518_s_at				211762_s_at	211762_s_at	214307_at
				205541_s_at				211998_at	211998_at	214320_x_at
				205613_at				212017_at	212017_at	214358_at
				205733_at				212038_s_at	212038_s_at	214472_at
				205780_at				212115_at	212115_at	214522_x_at
				205942_s_at				212129_at	212129_at	214605_x_at
				206073_at				212143_s_at	212143_s_at	214607_at
				206088_at				212148_at	212148_at	214697_s_at
				206142_at				212153_at	212153_at	214745_at
				206303_s_at				212160_at	212160_at	214821_at
				206364_at				212163_at	212163_at	214915_at
				206632_s_at				212199_at	212199_at	214918_at
				206659_at				212222_at	212222_at	214951_at
				206702_at				212232_at	212232_at	214996_at
				206722_s_at				212288_at	212288_at	215033_at
				206954_at				212296_at	212296_at	215058_at
				207154_at				212299_at	212299_at	215069_at
				207165_at				212314_at	212314_at	215139_at
				207357_s_at				212345_s_at	212345_s_at	215162_at
				207474_at				212350_at	212350_at	215232_at
				207757_at				212353_at	212353_at	215255_at
				207828_s_at				212354_at	212354_at	215285_s_at
				207837_at				212449_s_at	212449_s_at	215316_at
				208079_s_at				212534_at	212534_at	215367_at
				208102_s_at				212535_at	212535_at	215369_at
				208103_s_at				212539_at	212539_at	215371_at
				208395_s_at				212542_s_at	212542_s_at	215471_s_at
				208707_at				212549_at	212549_at	215474_at
				208711_s_at				212653_s_at	212653_s_at	215501_s_at
				209243_s_at				212675_s_at	212675_s_at	215521_at
				209408_at				212692_s_at	212692_s_at	215540_at
				209426_s_at				212764_at	212764_at	215554_at
				209464_at				212765_at	212765_at	215569_at
				209626_s_at				212812_at	212812_at	215578_at
				209627_s_at				212813_at	212813_at	215579_at
				209639_s_at				212859_x_at	212859_x_at	215592_at
				209709_s_at				212914_at	212914_at	215615_x_at
				209714_s_at				212915_at	212915_at	215630_at
				209981_at				212922_s_at	212922_s_at	215636_at
				209983_s_at				212953_x_at	212953_x_at	215654_at
				210052_s_at				212982_at	212982_at	215826_x_at
				210073_at				213005_s_at	213005_s_at	215883_at
				210268_at				213075_at	213075_at	215900_at
				210385_s_at				213153_at	213153_at	215933_s_at
				210476_s_at				213222_at	213222_at	216063_at
				210486_at				213243_at	213243_at	216130_at
				210559_s_at				213348_at	213348_at	216388_s_at
				210571_s_at				213364_s_at	213364_s_at	216472_at
				210608_s_at				213400_s_at	213400_s_at	216521_s_at
				210653_s_at				213422_s_at	213422_s_at	216548_x_at
				210675_s_at				213451_x_at	213451_x_at	216568_x_at
				210821_x_at				213476_x_at	213476_x_at	216609_at
				210867_at				213488_at	213488_at	216611_s_at
				210880_s_at				213568_at	213568_at	216628_at
				210882_s_at				213629_x_at	213629_x_at	216638_s_at
				211592_s_at				213645_at	213645_at	216749_at
				211598_x_at				213649_at	213649_at	216783_at
				211695_x_at				213693_s_at	213693_s_at	216831_s_at
				211776_s_at				213694_at	213694_at	216899_s_at
				212020_s_at				213707_s_at	213707_s_at	216905_s_at
				212021_s_at				213720_s_at	213720_s_at	216924_s_at
				212022_s_at				213844_at	213844_at	216953_s_at
				212023_s_at				214035_x_at	214035_x_at	217042_at
				212315_s_at				214093_s_at	214093_s_at	217197_x_at
				212527_at				214096_s_at	214096_s_at	217220_at
				212529_at				214179_s_at	214179_s_at	217293_at
				212563_at				214214_s_at	214214_s_at	217341_at
				212801_at				214501_s_at	214501_s_at	217506_at
				212843_at				214686_at	214686_at	217540_at
				212902_at				214715_x_at	214715_x_at	217642_at
				212949_at				214724_at	214724_at	217664_at
				213096_at				214736_s_at	214736_s_at	217998_at
				213202_at				214753_at	214753_at	217999_s_at
				213381_at				215071_s_at	215071_s_at	218073_s_at
				213412_at				215179_x_at	215179_x_at	218077_s_at
				213416_at				215380_s_at	215380_s_at	218275_at
				213493_at				215438_x_at	215438_x_at	218355_at
				213506_at				215588_x_at	215588_x_at	218365_s_at
				213681_at				215600_x_at	215600_x_at	218542_at
				213714_at				215604_x_at	215604_x_at	218585_s_at
				213776_at				215726_s_at	215726_s_at	218662_s_at
				213854_at				216215_s_at	216215_s_at	218663_at
				213936_x_at				216640_s_at	216640_s_at	218692_at
				213946_s_at				216858_x_at	216858_x_at	218700_s_at
				214078_at				217165_x_at	217165_x_at	218726_at
				214082_at				217294_s_at	217294_s_at	218730_s_at
				214205_x_at				217356_s_at	217356_s_at	218739_at
				214264_s_at				217617_at	217617_at	218755_at
				214384_s_at				217679_x_at	217679_x_at	218808_at
				214607_at				217734_s_at	217734_s_at	218883_s_at
				214697_s_at				217736_s_at	217736_s_at	218884_s_at
				214710_s_at				217743_s_at	217743_s_at	218892_at
				214745_at				217744_s_at	217744_s_at	218913_s_at
				214915_at				217746_s_at	217746_s_at	219026_s_at
				214918_at				217751_at	217751_at	219127_at
				215044_s_at				217758_s_at	217758_s_at	219148_at
				215140_at				217761_at	217761_at	219323_s_at
				215162_at				217766_s_at	217766_s_at	219360_s_at
				215232_at				217832_at	217832_at	219439_at
				215255_at				217833_at	217833_at	219461_at
				215358_x_at				217836_s_at	217836_s_at	219476_at
				215375_x_at				217866_at	217866_at	219510_at
				215462_at				217885_at	217885_at	219532_at
				215471_s_at				217901_at	217901_at	219544_at
				215474_at				217933_s_at	217933_s_at	219551_at
				215501_s_at				217938_s_at	217938_s_at	219577_s_at
				215513_at				217954_s_at	217954_s_at	219578_s_at
				215521_at				217969_at	217969_at	219650_at
				215555_at				217989_at	217989_at	219662_at
				215592_at				217995_at	217995_at	219685_at
				215630_at				217996_at	217996_at	219699_at
				215683_at				218003_s_at	218003_s_at	219720_s_at
				215766_at				218008_at	218008_at	219725_at
				215791_at				218117_at	218117_at	219735_s_at
				215811_at				218140_x_at	218140_x_at	219768_at
				215883_at				218160_at	218160_at	219785_s_at
				215900_at				218188_s_at	218188_s_at	219836_at
				216081_at				218189_s_at	218189_s_at	219855_at
				216114_at				218242_s_at	218242_s_at	219858_s_at
				216229_x_at				218259_at	218259_at	219894_at
				216330_s_at				218263_s_at	218263_s_at	219914_at
				216472_at				218312_s_at	218312_s_at	219918_s_at
				216614_at				218320_s_at	218320_s_at	219973_at
				216628_at				218358_at	218358_at	219976_at
				216638_s_at				218380_at	218380_at	219978_s_at
				216905_s_at				218435_at	218435_at	219990_at
				217506_at				218518_at	218518_at	219995_s_at
				217536_x_at				218528_s_at	218528_s_at	220024_s_at
				217631_at				218563_at	218563_at	220028_at
				217659_at				218580_x_at	218580_x_at	220104_at
				218039_at				218641_at	218641_at	220133_at
				218073_s_at				218648_at	218648_at	220144_s_at
				218275_at				218694_at	218694_at	220150_s_at
				218355_at				218820_at	218820_at	220153_at
				218362_s_at				218966_at	218966_at	220185_at
				218542_at				219065_s_at	219065_s_at	220215_at
				218585_s_at				219087_at	219087_at	220374_at
				218662_s_at				219090_at	219090_at	220396_at
				218663_at				219511_s_at	219511_s_at	220416_at
				218700_s_at				219682_s_at	219682_s_at	220483_s_at
				218726_at				219791_s_at	219791_s_at	220484_at
				218739_at				219935_at	219935_at	220518_at
				218755_at				220046_s_at	220046_s_at	220572_at
				218883_s_at				220272_at	220272_at	220578_at
				218981_at				220319_s_at	220319_s_at	220612_at
				219113_x_at				220741_s_at	220741_s_at	220638_s_at
				219127_at				220948_s_at	220948_s_at	220651_s_at
				219148_at				220966_x_at	220966_x_at	220687_at
				219181_at				221499_s_at	221499_s_at	220711_at
				219211_at				221506_s_at	221506_s_at	220715_at
				219360_s_at				221570_s_at	221570_s_at	220719_at
				219416_at				221741_s_at	221741_s_at	220818_s_at
				219494_at				221763_at	221763_at	220827_at
				219510_at				221768_at	221768_at	220855_at
				219544_at				221989_at	221989_at	220892_s_at
				219545_at				222101_s_at	222101_s_at	220898_at
				219551_at				222162_s_at	222162_s_at	220906_at
				219555_s_at				266_s_at	266_s_at	220923_s_at
				219573_at				32259_at	32259_at	221042_s_at
				219617_at				37005_at	37005_at	221194_s_at
				219665_at				40225_at	40225_at	221234_s_at
				219685_at				40446_at	40446_at	221240_s_at
				219699_at				46256_at	46256_at	221272_s_at
				219725_at				56256_at	56256_at	221288_at
				219785_s_at				201291_s_at		221413_at
				219787_s_at				201292_at		221436_s_at
				219836_at				201372_s_at		221520_s_at
				219855_at				201467_s_at		221591_s_at
				219902_at				201557_at		221626_at
				219918_s_at				201562_s_at		221648_s_at
				219978_s_at				202094_at		221753_at
				219990_at				202095_s_at		221901_at
				220038_at				202195_s_at		221908_at
				220144_s_at				202206_at		221946_at
				220150_s_at				202410_x_at		221959_at
				220161_s_at				202580_x_at		222037_at
				220215_at				202652_at		222054_at
				220416_at				202695_s_at		222141_at
				220480_at				202712_s_at		222161_at
				220483_s_at				203214_x_at		222184_at
				220484_at				203276_at		222208_s_at
				220638_s_at				203362_s_at		222225_at
				220651_s_at				203418_at		222337_at
				220711_at				203641_s_at		222378_at
				220779_at				203672_x_at		32128_at
				220898_at				203736_s_at		37201_at
				220923_s_at				203755_at		52255_s_at
				221234_s_at				203764_at		52837_at
				221272_s_at				203779_s_at		58916_at
				221413_at				203805_s_at		AFFX-HUMISGF3A/M97935_MB_at
				221436_s_at				203806_s_at
				221520_s_at				203861_s_at
				221591_s_at				203968_s_at
				221885_at				203969_at
				221901_at				204033_at
				221959_at				204077_x_at
				222054_at				204092_s_at
				222141_at				204126_s_at
				222161_at				204134_at
				222193_at				204154_at
				222339_x_at				204162_at
				222378_at				204240_s_at
				37226_at				204318_s_at
				52837_at				204407_at
				58308_at				204421_s_at
				58916_at				204422_s_at
								204437_s_at
								204444_at
								204541_at
								204549_at
								204558_at
								204580_at
								204641_at
								204649_at
								204695_at
								204702_s_at
								204709_s_at
								204717_s_at
								204738_s_at
								204751_x_at
								204783_at
								204802_at
								204803_s_at
								204817_at
								204822_at
								204850_s_at
								204851_s_at
								204875_s_at
								204886_at
								204887_s_at
								204962_s_at
								204972_at
								205024_s_at
								205034_at
								205046_at
								205139_s_at
								205190_at
								205195_at
								205203_at
								205239_at
								205246_at
								205282_at
								205297_s_at
								205309_at
								205393_s_at
								205394_at
								205403_at
								205428_s_at
								205433_at
								205498_at
								205518_s_at
								205611_at
								205663_at
								205688_at
								205699_at
								205733_at
								205759_s_at
								205767_at
								205768_s_at
								205769_at
								205780_at
								205782_at
								205794_s_at
								205816_at
								205972_at
								206023_at
								206027_at
								206073_at
								206084_at
								206088_at
								206090_s_at
								206142_at
								206346_at
								206348_s_at
								206364_at
								206512_at
								206558_at
								206625_at
								206632_s_at
								206661_at
								206669_at
								206670_s_at
								206671_at
								206721_at
								206738_at
								206767_at
								206784_at
								206791_s_at
								206954_at
								207034_s_at
								207057_at
								207068_at
								207165_at
								207223_s_at
								207255_at
								207263_x_at
								207287_at
								207357_s_at
								207572_at
								207623_at
								207717_s_at
								207728_at
								207757_at
								207758_at
								207766_at
								207799_x_at
								207837_at
								207850_at
								207895_at
								208025_s_at
								208079_s_at
								208102_s_at
								208103_s_at
								208107_s_at
								208138_at
								208156_x_at
								208199_s_at
								208205_at
								208323_s_at
								208396_s_at
								208492_at
								208504_x_at
								208516_at
								208523_x_at
								208558_at
								208561_at
								208790_s_at
								209133_s_at
								209243_s_at
								209426_s_at
								209464_at
								209470_s_at
								209569_x_at
								209599_s_at
								209612_s_at
								209613_s_at
								209615_s_at
								209626_s_at
								209627_s_at
								209631_s_at
								209639_s_at
								209642_at
								209683_at
								209709_s_at
								209714_s_at
								209763_at
								209904_at
								209921_at
								209924_at
								209925_at
								209949_at
								209983_s_at
								209993_at
								209994_s_at
								210007_s_at
								210021_s_at
								210048_at
								210050_at
								210052_s_at
								210058_at
								210064_s_at
								210073_at
								210161_at
								210162_s_at
								210170_at
								210187_at
								210237_at
								210253_at
								210268_at
								210301_at
								210334_x_at
								210365_at
								210379_s_at
								210405_x_at
								210476_s_at
								210486_at
								210559_s_at
								210571_s_at
								210608_s_at
								210653_s_at
								210675_s_at
								210714_at
								210813_s_at
								210821_x_at
								210867_at
								210868_s_at
								210870_s_at
								210880_s_at
								210881_s_at
								210882_s_at
								210883_x_at
								210904_s_at
								210956_at
								210990_s_at
								211105_s_at
								211130_x_at
								211162_x_at
								211279_at
								211372_s_at
								211374_x_at
								211701_s_at
								211708_s_at
								211776_s_at
								211867_s_at
								211879_x_at
								211899_s_at
								212020_s_at
								212021_s_at
								212022_s_at
								212023_s_at
								212172_at
								212415_at
								212527_at
								212801_at
								212843_at
								212949_at
								213096_at
								213183_s_at
								213317_at
								213332_at
								213339_at
								213381_at
								213401_s_at
								213412_at
								213416_at
								213433_at
								213438_at
								213456_at
								213461_at
								213493_at
								213506_at
								213599_at
								213615_at
								213714_at
								213744_at
								213745_at
								213854_at
								213908_at
								213912_at
								213933_at
								213936_x_at
								213946_s_at
								213960_at
								213974_at
								213992_at
								214053_at
								214058_at
								214063_s_at
								214071_at
								214078_at
								214157_at
								214192_at
								214294_at
								214303_x_at
								214307_at
								214320_x_at
								214358_at
								214472_at
								214522_x_at
								214605_x_at
								214607_at
								214697_s_at
								214745_at
								214821_at
								214915_at
								214918_at
								214951_at
								214996_at
								215033_at
								215058_at
								215069_at
								215139_at
								215162_at
								215232_at
								215255_at
								215285_s_at
								215316_at
								215367_at
								215369_at
								215371_at
								215471_s_at
								215474_at
								215501_s_at
								215521_at
								215540_at
								215554_at
								215569_at
								215578_at
								215579_at
								215592_at
								215615_x_at
								215630_at
								215636_at
								215654_at
								215826_x_at
								215883_at
								215900_at
								215933_s_at
								216063_at
								216130_at
								216388_s_at
								216472_at
								216521_s_at
								216548_x_at
								216568_x_at
								216609_at
								216611_s_at
								216628_at
								216638_s_at
								216749_at
								216783_at
								216831_s_at
								216899_s_at
								216905_s_at
								216924_s_at
								216953_s_at
								217042_at
								217197_x_at
								217220_at
								217293_at
								217341_at
								217506_at
								217540_at
								217642_at
								217664_at
								217998_at
								217999_s_at
								218073_s_at
								218077_s_at
								218275_at
								218355_at
								218365_s_at
								218542_at
								218585_s_at
								218662_s_at
								218663_at
								218692_at
								218700_s_at
								218726_at
								218730_s_at
								218739_at
								218755_at
								218808_at
								218883_s_at
								218884_s_at
								218892_at
								218913_s_at
								219026_s_at
								219127_at
								219148_at
								219323_s_at
								219360_s_at
								219439_at
								219461_at
								219476_at
								219510_at
								219532_at
								219544_at
								219551_at
								219577_s_at
								219578_s_at
								219650_at
								219662_at
								219685_at
								219699_at
								219720_s_at
								219725_at
								219735_s_at
								219768_at
								219785_s_at
								219836_at
								219855_at
								219858_s_at
								219894_at
								219914_at
								219918_s_at
								219973_at
								219976_at
								219978_s_at
								219990_at
								219995_s_at
								220024_s_at
								220028_at
								220104_at
								220133_at
								220144_s_at
								220150_s_at
								220153_at
								220185_at
								220215_at
								220374_at
								220396_at
								220416_at
								220483_s_at
								220484_at
								220518_at
								220572_at
								220578_at
								220612_at
								220638_s_at
								220651_s_at
								220687_at
								220711_at
								220715_at
								220719_at
								220818_s_at
								220827_at
								220855_at
								220892_s_at
								220898_at
								220906_at
								220923_s_at
								221042_s_at
								221194_s_at
								221234_s_at
								221240_s_at
								221272_s_at
								221288_at
								221413_at
								221436_s_at
								221520_s_at
								221591_s_at
								221626_at
								221648_s_at
								221753_at
								221901_at
								221908_at
								221946_at
								221959_at
								222037_at
								222054_at
								222141_at
								222161_at
								222184_at
								222208_s_at
								222225_at
								222337_at
								222378_at
								32128_at
								37201_at
								52255_s_at
								52837_at
								58916_at
								AFFX-HUMISGF3A/M97935_MB_at

## Sheet: GSE7846
Welch's t-test results				CASh 0.01 results				CASh 0.05 results
all	up	down		all	up	down		all	up	down
0	0	0		1554127_s_at	1554127_s_at	1552487_a_at		200052_s_at	200052_s_at	201117_s_at
				1567458_s_at	1567458_s_at	1553180_at		200598_s_at	200598_s_at	201187_s_at
				201186_at	201186_at	1558199_at		200602_at	200602_at	201228_s_at
				201445_at	201445_at	1560554_a_at		200604_s_at	200604_s_at	201286_at
				201620_at	201620_at	1561418_at		200606_at	200606_at	201689_s_at
				202100_at	202100_at	1564475_s_at		200659_s_at	200659_s_at	202035_s_at
				202511_s_at	202511_s_at	1570026_at		200722_s_at	200722_s_at	202196_s_at
				202628_s_at	202628_s_at	205357_s_at		200732_s_at	200732_s_at	202482_x_at
				202641_at	202641_at	206581_at		200784_s_at	200784_s_at	202498_s_at
				203323_at	203323_at	208016_s_at		200785_s_at	200785_s_at	202552_s_at
				203951_at	203951_at	214702_at		200790_at	200790_at	202663_at
				206117_at	206117_at	214772_at		200793_s_at	200793_s_at	202977_s_at
				209765_at	209765_at	219949_at		200846_s_at	200846_s_at	203023_at
				210621_s_at	210621_s_at	220454_s_at		200892_s_at	200892_s_at	203086_at
				210869_s_at	210869_s_at	223125_s_at		200895_s_at	200895_s_at	203141_s_at
				211284_s_at	211284_s_at	223340_at		200997_at	200997_at	203158_s_at
				211340_s_at	211340_s_at	224484_s_at		201015_s_at	201015_s_at	203302_at
				212091_s_at	212091_s_at	228383_at		201040_at	201040_at	203485_at
				212233_at	212233_at	228731_at		201050_at	201050_at	203559_s_at
				212396_s_at	212396_s_at	230626_at		201074_at	201074_at	203603_s_at
				214946_x_at	214946_x_at	230729_at		201087_at	201087_at	203619_s_at
				215501_s_at	215501_s_at	230991_at		201116_s_at	201116_s_at	203698_s_at
				216250_s_at	216250_s_at	231048_at		201117_s_at	201117_s_at	203705_s_at
				221641_s_at	221641_s_at	231637_at		201131_s_at	201131_s_at	203706_s_at
				221685_s_at	221685_s_at	233063_s_at		201133_s_at	201133_s_at	203803_at
				222154_s_at	222154_s_at	236464_at		201147_s_at	201147_s_at	203881_s_at
				222433_at	222433_at	238491_at		201209_at	201209_at	203901_at
				222454_s_at	222454_s_at	239537_at		201218_at	201218_at	203908_at
				222552_at	222552_at	239907_at		201224_s_at	201224_s_at	203946_s_at
				224657_at	224657_at	242326_at		201264_at	201264_at	204006_s_at
				224800_at	224800_at	242404_at		201267_s_at	201267_s_at	204032_at
				224993_at	224993_at	242462_at		201274_at	201274_at	204095_s_at
				225183_at	225183_at	243000_at		201288_at	201288_at	204110_at
				225646_at	225646_at	243790_at		201311_s_at	201311_s_at	204176_at
				225695_at	225695_at	243864_at		201320_at	201320_at	204236_at
				225867_at	225867_at			201324_at	201324_at	204270_at
				225900_at	225900_at			201325_s_at	201325_s_at	204527_at
				226022_at	226022_at			201362_at	201362_at	204591_at
				35626_at	35626_at			201363_s_at	201363_s_at	204642_at
				1552487_a_at				201373_at	201373_at	204665_at
				1553180_at				201381_x_at	201381_x_at	204717_s_at
				1558199_at				201391_at	201391_at	204724_s_at
				1560554_a_at				201394_s_at	201394_s_at	204736_s_at
				1561418_at				201431_s_at	201431_s_at	204796_at
				1564475_s_at				201445_at	201445_at	204799_at
				1570026_at				201446_s_at	201446_s_at	204859_s_at
				205357_s_at				201459_at	201459_at	204885_s_at
				206581_at				201462_at	201462_at	204897_at
				208016_s_at				201475_x_at	201475_x_at	204938_s_at
				214702_at				201511_at	201511_at	204940_at
				214772_at				201539_s_at	201539_s_at	204959_at
				219949_at				201554_x_at	201554_x_at	205005_s_at
				220454_s_at				201577_at	201577_at	205027_s_at
				223125_s_at				201581_at	201581_at	205279_s_at
				223340_at				201603_at	201603_at	205411_at
				224484_s_at				201615_x_at	201615_x_at	205414_s_at
				228383_at				201617_x_at	201617_x_at	205421_at
				228731_at				201668_x_at	201668_x_at	205433_at
				230626_at				201718_s_at	201718_s_at	205440_s_at
				230729_at				201719_s_at	201719_s_at	205491_s_at
				230991_at				201743_at	201743_at	205501_at
				231048_at				201768_s_at	201768_s_at	205531_s_at
				231637_at				201780_s_at	201780_s_at	205539_at
				233063_s_at				201799_s_at	201799_s_at	205555_s_at
				236464_at				201810_s_at	201810_s_at	205609_at
				238491_at				201811_x_at	201811_x_at	205617_at
				239537_at				201814_at	201814_at	205619_s_at
				239907_at				201829_at	201829_at	205659_at
				242326_at				201839_s_at	201839_s_at	205700_at
				242404_at				201843_s_at	201843_s_at	205709_s_at
				242462_at				201865_x_at	201865_x_at	205799_s_at
				243000_at				201875_s_at	201875_s_at	205801_s_at
				243790_at				201925_s_at	201925_s_at	205844_at
				243864_at				201926_s_at	201926_s_at	205860_x_at
								201932_at	201932_at	205908_s_at
								201933_at	201933_at	205997_at
								201946_s_at	201946_s_at	206007_at
								201953_at	201953_at	206036_s_at
								201955_at	201955_at	206043_s_at
								201957_at	201957_at	206070_s_at
								201960_s_at	201960_s_at	206167_s_at
								201963_at	201963_at	206201_s_at
								202003_s_at	202003_s_at	206224_at
								202004_x_at	202004_x_at	206239_s_at
								202010_s_at	202010_s_at	206262_at
								202023_at	202023_at	206319_s_at
								202047_s_at	202047_s_at	206345_s_at
								202073_at	202073_at	206358_at
								202074_s_at	202074_s_at	206394_at
								202089_s_at	202089_s_at	206400_at
								202104_s_at	202104_s_at	206561_s_at
								202118_s_at	202118_s_at	206578_at
								202138_x_at	202138_x_at	206584_at
								202154_x_at	202154_x_at	206643_at
								202157_s_at	202157_s_at	206669_at
								202164_s_at	202164_s_at	206704_at
								202177_at	202177_at	206740_x_at
								202192_s_at	202192_s_at	206785_s_at
								202201_at	202201_at	206806_at
								202202_s_at	202202_s_at	206893_at
								202220_at	202220_at	207012_at
								202223_at	202223_at	207062_at
								202242_at	202242_at	207137_at
								202276_at	202276_at	207175_at
								202282_at	202282_at	207177_at
								202305_s_at	202305_s_at	207179_at
								202320_at	202320_at	207234_at
								202331_at	202331_at	207254_at
								202350_s_at	202350_s_at	207257_at
								202357_s_at	202357_s_at	207295_at
								202361_at	202361_at	207301_at
								202381_at	202381_at	207373_at
								202425_x_at	202425_x_at	207445_s_at
								202429_s_at	202429_s_at	207496_at
								202437_s_at	202437_s_at	207528_s_at
								202441_at	202441_at	207545_s_at
								202449_s_at	202449_s_at	207575_at
								202454_s_at	202454_s_at	207677_s_at
								202488_s_at	202488_s_at	207802_at
								202489_s_at	202489_s_at	207957_s_at
								202539_s_at	202539_s_at	207996_s_at
								202551_s_at	202551_s_at	208016_s_at
								202554_s_at	202554_s_at	208062_s_at
								202560_s_at	202560_s_at	208201_at
								202565_s_at	202565_s_at	208291_s_at
								202597_at	202597_at	208311_at
								202637_s_at	202637_s_at	208353_x_at
								202670_at	202670_at	208359_s_at
								202709_at	202709_at	208381_s_at
								202718_at	202718_at	208399_s_at
								202723_s_at	202723_s_at	208448_x_at
								202724_s_at	202724_s_at	208470_s_at
								202746_at	202746_at	208562_s_at
								202747_s_at	202747_s_at	208935_s_at
								202760_s_at	202760_s_at	209211_at
								202762_at	202762_at	209307_at
								202772_at	202772_at	209606_at
								202790_at	202790_at	209613_s_at
								202794_at	202794_at	209626_s_at
								202801_at	202801_at	209676_at
								202826_at	202826_at	209742_s_at
								202838_at	202838_at	209754_s_at
								202877_s_at	202877_s_at	209756_s_at
								202878_s_at	202878_s_at	209811_at
								202897_at	202897_at	210002_at
								202902_s_at	202902_s_at	210078_s_at
								202917_s_at	202917_s_at	210108_at
								202946_s_at	202946_s_at	210198_s_at
								202950_at	202950_at	210218_s_at
								202951_at	202951_at	210222_s_at
								202953_at	202953_at	210375_at
								202962_at	202962_at	210507_s_at
								202992_at	202992_at	210523_at
								202996_at	202996_at	210540_s_at
								203002_at	203002_at	210550_s_at
								203007_x_at	203007_x_at	210559_s_at
								203037_s_at	203037_s_at	210614_at
								203043_at	203043_at	210675_s_at
								203065_s_at	203065_s_at	210704_at
								203066_at	203066_at	210711_at
								203074_at	203074_at	210717_at
								203104_at	203104_at	210723_x_at
								203125_x_at	203125_x_at	210730_s_at
								203159_at	203159_at	211219_s_at
								203167_at	203167_at	211221_at
								203185_at	203185_at	211367_s_at
								203238_s_at	203238_s_at	211368_s_at
								203243_s_at	203243_s_at	211401_s_at
								203287_at	203287_at	211441_x_at
								203300_x_at	203300_x_at	211451_s_at
								203305_at	203305_at	211466_at
								203313_s_at	203313_s_at	211540_s_at
								203323_at	203323_at	211606_at
								203336_s_at	203336_s_at	211637_x_at
								203391_at	203391_at	211659_at
								203401_at	203401_at	211734_s_at
								203404_at	203404_at	211742_s_at
								203414_at	203414_at	211795_s_at
								203434_s_at	203434_s_at	211798_x_at
								203435_s_at	203435_s_at	211869_at
								203453_at	203453_at	212029_s_at
								203473_at	203473_at	212122_at
								203524_s_at	203524_s_at	212220_at
								203530_s_at	203530_s_at	212545_s_at
								203548_s_at	203548_s_at	212592_at
								203549_s_at	203549_s_at	212681_at
								203562_at	203562_at	212886_at
								203570_at	203570_at	212989_at
								203571_s_at	203571_s_at	212990_at
								203605_at	203605_at	213094_at
								203615_x_at	203615_x_at	213167_s_at
								203645_s_at	203645_s_at	213307_at
								203652_at	203652_at	213308_at
								203657_s_at	203657_s_at	213316_at
								203661_s_at	203661_s_at	213317_at
								203662_s_at	203662_s_at	213362_at
								203680_at	203680_at	213401_s_at
								203706_s_at	203706_s_at	213425_at
								203712_at	203712_at	213438_at
								203727_at	203727_at	213506_at
								203789_s_at	203789_s_at	213558_at
								203799_at	203799_at	213644_at
								203812_at	203812_at	213684_s_at
								203813_s_at	203813_s_at	213719_s_at
								203835_at	203835_at	213751_at
								203836_s_at	203836_s_at	213761_at
								203859_s_at	203859_s_at	213764_s_at
								203868_s_at	203868_s_at	213806_at
								203892_at	203892_at	213816_s_at
								203897_at	203897_at	213817_at
								203910_at	203910_at	213896_x_at
								203944_x_at	203944_x_at	213974_at
								203951_at	203951_at	214012_at
								203953_s_at	203953_s_at	214021_x_at
								203954_x_at	203954_x_at	214071_at
								203980_at	203980_at	214191_at
								203997_at	203997_at	214269_at
								204019_s_at	204019_s_at	214270_s_at
								204082_at	204082_at	214307_at
								204083_s_at	204083_s_at	214318_s_at
								204114_at	204114_at	214420_s_at
								204118_at	204118_at	214467_at
								204122_at	204122_at	214528_s_at
								204124_at	204124_at	214533_at
								204134_at	204134_at	214551_s_at
								204135_at	204135_at	214577_at
								204150_at	204150_at	214599_at
								204151_x_at	204151_x_at	214611_at
								204158_s_at	204158_s_at	214632_at
								204223_at	204223_at	214673_s_at
								204284_at	204284_at	214697_s_at
								204319_s_at	204319_s_at	214770_at
								204352_at	204352_at	214913_at
								204427_s_at	204427_s_at	215124_at
								204436_at	204436_at	215188_at
								204438_at	204438_at	215237_at
								204457_s_at	204457_s_at	215264_at
								204482_at	204482_at	215272_at
								204519_s_at	204519_s_at	215303_at
								204570_at	204570_at	215314_at
								204589_at	204589_at	215321_at
								204606_at	204606_at	215388_s_at
								204633_s_at	204633_s_at	215538_at
								204635_at	204635_at	215571_at
								204640_s_at	204640_s_at	215581_s_at
								204658_at	204658_at	215617_at
								204682_at	204682_at	215638_at
								204688_at	204688_at	215871_at
								204691_x_at	204691_x_at	215933_s_at
								204719_at	204719_at	215998_at
								204765_at	204765_at	216100_s_at
								204779_s_at	204779_s_at	216154_at
								204787_at	204787_at	216155_at
								204834_at	204834_at	216175_at
								204846_at	204846_at	216191_s_at
								204864_s_at	204864_s_at	216350_s_at
								204894_s_at	204894_s_at	216370_s_at
								204903_x_at	204903_x_at	216424_at
								204905_s_at	204905_s_at	216470_x_at
								204939_s_at	204939_s_at	216510_x_at
								204955_at	204955_at	216534_at
								204964_s_at	204964_s_at	216543_at
								205044_at	205044_at	216638_s_at
								205083_at	205083_at	216720_at
								205100_at	205100_at	216816_at
								205202_at	205202_at	216834_at
								205226_at	205226_at	216855_s_at
								205236_x_at	205236_x_at	216899_s_at
								205291_at	205291_at	216905_s_at
								205313_at	205313_at	216931_at
								205328_at	205328_at	216937_s_at
								205330_at	205330_at	217000_at
								205366_s_at	205366_s_at	217010_s_at
								205384_at	205384_at	217112_at
								205399_at	205399_at	217172_at
								205405_at	205405_at	217182_at
								205474_at	205474_at	217212_s_at
								205495_s_at	205495_s_at	217230_at
								205513_at	205513_at	217280_x_at
								205529_s_at	205529_s_at	217328_at
								205624_at	205624_at	217448_s_at
								205648_at	205648_at	217471_at
								205654_at	205654_at	217475_s_at
								205683_x_at	205683_x_at	217500_at
								205779_at	205779_at	217504_at
								205913_at	205913_at	217533_x_at
								205932_s_at	205932_s_at	217561_at
								205979_at	205979_at	217590_s_at
								206049_at	206049_at	217639_at
								206101_at	206101_at	217666_at
								206245_s_at	206245_s_at	218087_s_at
								206488_s_at	206488_s_at	218128_at
								206858_s_at	206858_s_at	218182_s_at
								206859_s_at	206859_s_at	218326_s_at
								207011_s_at	207011_s_at	218657_at
								207035_at	207035_at	218668_s_at
								207134_x_at	207134_x_at	218701_at
								207169_x_at	207169_x_at	218748_s_at
								207170_s_at	207170_s_at	219015_s_at
								207480_s_at	207480_s_at	219017_at
								207525_s_at	207525_s_at	219087_at
								207542_s_at	207542_s_at	219181_at
								207549_x_at	207549_x_at	219209_at
								207785_s_at	207785_s_at	219295_s_at
								207802_at	207802_at	219312_s_at
								207808_s_at	207808_s_at	219313_at
								207847_s_at	207847_s_at	219347_at
								207876_s_at	207876_s_at	219386_s_at
								207961_x_at	207961_x_at	219450_at
								207977_s_at	207977_s_at	219501_at
								208029_s_at	208029_s_at	219513_s_at
								208131_s_at	208131_s_at	219529_at
								208146_s_at	208146_s_at	219533_at
								208286_x_at	208286_x_at	219537_x_at
								208335_s_at	208335_s_at	219540_at
								208609_s_at	208609_s_at	219568_x_at
								208615_s_at	208615_s_at	219580_s_at
								208650_s_at	208650_s_at	219604_s_at
								208651_x_at	208651_x_at	219607_s_at
								208686_s_at	208686_s_at	219694_at
								208750_s_at	208750_s_at	219778_at
								208758_at	208758_at	219850_s_at
								208779_x_at	208779_x_at	219882_at
								208790_s_at	208790_s_at	219928_s_at
								208792_s_at	208792_s_at	219947_at
								208823_s_at	208823_s_at	219959_at
								208850_s_at	208850_s_at	219976_at
								208854_s_at	208854_s_at	220037_s_at
								208874_x_at	208874_x_at	220038_at
								208967_s_at	208967_s_at	220057_at
								208970_s_at	208970_s_at	220064_at
								208981_at	208981_at	220100_at
								208983_s_at	208983_s_at	220102_at
								209035_at	209035_at	220122_at
								209047_at	209047_at	220159_at
								209049_s_at	209049_s_at	220170_at
								209067_s_at	209067_s_at	220191_at
								209070_s_at	209070_s_at	220276_at
								209071_s_at	209071_s_at	220297_at
								209087_x_at	209087_x_at	220312_at
								209099_x_at	209099_x_at	220322_at
								209114_at	209114_at	220330_s_at
								209123_at	209123_at	220392_at
								209138_x_at	209138_x_at	220416_at
								209150_s_at	209150_s_at	220450_at
								209166_s_at	209166_s_at	220459_at
								209173_at	209173_at	220480_at
								209190_s_at	209190_s_at	220648_at
								209199_s_at	209199_s_at	220723_s_at
								209219_at	209219_at	220761_s_at
								209262_s_at	209262_s_at	220806_x_at
								209263_x_at	209263_x_at	220958_at
								209264_s_at	209264_s_at	221035_s_at
								209272_at	209272_at	221062_at
								209302_at	209302_at	221075_s_at
								209311_at	209311_at	221088_s_at
								209337_at	209337_at	221110_x_at
								209348_s_at	209348_s_at	221156_x_at
								209356_x_at	209356_x_at	221160_s_at
								209384_at	209384_at	221210_s_at
								209409_at	209409_at	221224_s_at
								209435_s_at	209435_s_at	221245_s_at
								209496_at	209496_at	221276_s_at
								209529_at	209529_at	221289_at
								209536_s_at	209536_s_at	221308_at
								209543_s_at	209543_s_at	221325_at
								209552_at	209552_at	221372_s_at
								209558_s_at	209558_s_at	221384_at
								209596_at	209596_at	221393_at
								209605_at	209605_at	221444_at
								209607_x_at	209607_x_at	221577_x_at
								209612_s_at	209612_s_at	221586_s_at
								209613_s_at	209613_s_at	221615_at
								209621_s_at	209621_s_at	221618_s_at
								209656_s_at	209656_s_at	221634_at
								209680_s_at	209680_s_at	221796_at
								209687_at	209687_at	221909_at
								209698_at	209698_at	222043_at
								209699_x_at	209699_x_at	222062_at
								209710_at	209710_at	222156_x_at
								209721_s_at	209721_s_at	222262_s_at
								209758_s_at	209758_s_at	222291_at
								209759_s_at	209759_s_at	222292_at
								209763_at	209763_at	222312_s_at
								209772_s_at	209772_s_at	222379_at
								209815_at	209815_at	35148_at
								209823_x_at	209823_x_at	35974_at
								209834_at	209834_at	37079_at
								209897_s_at	209897_s_at	37512_at
								209898_x_at	209898_x_at	37986_at
								209901_x_at	209901_x_at	38241_at
								210002_at	210002_at	40284_at
								210029_at	210029_at	41577_at
								210136_at	210136_at	47553_at
								210213_s_at	210213_s_at	57540_at
								210298_x_at	210298_x_at
								210299_s_at	210299_s_at
								210418_s_at	210418_s_at
								210428_s_at	210428_s_at
								210580_x_at	210580_x_at
								210715_s_at	210715_s_at
								210826_x_at	210826_x_at
								210827_s_at	210827_s_at
								210859_x_at	210859_x_at
								210869_s_at	210869_s_at
								210980_s_at	210980_s_at
								211048_s_at	211048_s_at
								211275_s_at	211275_s_at
								211340_s_at	211340_s_at
								211430_s_at	211430_s_at
								211467_s_at	211467_s_at
								211475_s_at	211475_s_at
								211574_s_at	211574_s_at
								211599_x_at	211599_x_at
								211656_x_at	211656_x_at
								211675_s_at	211675_s_at
								211697_x_at	211697_x_at
								211758_x_at	211758_x_at
								211802_x_at	211802_x_at
								211958_at	211958_at
								211985_s_at	211985_s_at
								212010_s_at	212010_s_at
								212016_s_at	212016_s_at
								212116_at	212116_at
								212117_at	212117_at
								212118_at	212118_at
								212165_at	212165_at
								212167_s_at	212167_s_at
								212192_at	212192_at
								212223_at	212223_at
								212228_s_at	212228_s_at
								212229_s_at	212229_s_at
								212232_at	212232_at
								212233_at	212233_at
								212263_at	212263_at
								212280_x_at	212280_x_at
								212288_at	212288_at
								212291_at	212291_at
								212335_at	212335_at
								212344_at	212344_at
								212350_at	212350_at
								212400_at	212400_at
								212411_at	212411_at
								212439_at	212439_at
								212456_at	212456_at
								212457_at	212457_at
								212472_at	212472_at
								212508_at	212508_at
								212530_at	212530_at
								212558_at	212558_at
								212607_at	212607_at
								212632_at	212632_at
								212647_at	212647_at
								212671_s_at	212671_s_at
								212677_s_at	212677_s_at
								212713_at	212713_at
								212737_at	212737_at
								212767_at	212767_at
								212865_s_at	212865_s_at
								212895_s_at	212895_s_at
								212950_at	212950_at
								212956_at	212956_at
								213004_at	213004_at
								213009_s_at	213009_s_at
								213051_at	213051_at
								213058_at	213058_at
								213068_at	213068_at
								213069_at	213069_at
								213071_at	213071_at
								213095_x_at	213095_x_at
								213113_s_at	213113_s_at
								213133_s_at	213133_s_at
								213169_at	213169_at
								213193_x_at	213193_x_at
								213242_x_at	213242_x_at
								213258_at	213258_at
								213290_at	213290_at
								213294_at	213294_at
								213306_at	213306_at
								213397_x_at	213397_x_at
								213488_at	213488_at
								213568_at	213568_at
								213592_at	213592_at
								213620_s_at	213620_s_at
								213664_at	213664_at
								213675_at	213675_at
								213764_s_at	213764_s_at
								213765_at	213765_at
								213800_at	213800_at
								213823_at	213823_at
								213857_s_at	213857_s_at
								213869_x_at	213869_x_at
								213877_x_at	213877_x_at
								213915_at	213915_at
								213917_at	213917_at
								214030_at	214030_at
								214238_at	214238_at
								214247_s_at	214247_s_at
								214308_s_at	214308_s_at
								214323_s_at	214323_s_at
								214355_x_at	214355_x_at
								214505_s_at	214505_s_at
								214669_x_at	214669_x_at
								214677_x_at	214677_x_at
								214728_x_at	214728_x_at
								214761_at	214761_at
								214767_s_at	214767_s_at
								214784_x_at	214784_x_at
								214941_s_at	214941_s_at
								215049_x_at	215049_x_at
								215051_x_at	215051_x_at
								215071_s_at	215071_s_at
								215089_s_at	215089_s_at
								215121_x_at	215121_x_at
								215235_at	215235_at
								215379_x_at	215379_x_at
								215382_x_at	215382_x_at
								215388_s_at	215388_s_at
								215707_s_at	215707_s_at
								215714_s_at	215714_s_at
								215807_s_at	215807_s_at
								215873_x_at	215873_x_at
								215905_s_at	215905_s_at
								216033_s_at	216033_s_at
								216268_s_at	216268_s_at
								216321_s_at	216321_s_at
								216331_at	216331_at
								216449_x_at	216449_x_at
								216474_x_at	216474_x_at
								216483_s_at	216483_s_at
								216495_x_at	216495_x_at
								216594_x_at	216594_x_at
								216598_s_at	216598_s_at
								216620_s_at	216620_s_at
								216640_s_at	216640_s_at
								216730_at	216730_at
								217022_s_at	217022_s_at
								217143_s_at	217143_s_at
								217312_s_at	217312_s_at
								217492_s_at	217492_s_at
								217516_x_at	217516_x_at
								217525_at	217525_at
								217543_s_at	217543_s_at
								217707_x_at	217707_x_at
								217744_s_at	217744_s_at
								217745_s_at	217745_s_at
								217759_at	217759_at
								217781_s_at	217781_s_at
								217791_s_at	217791_s_at
								217804_s_at	217804_s_at
								217867_x_at	217867_x_at
								217873_at	217873_at
								217919_s_at	217919_s_at
								217933_s_at	217933_s_at
								217942_at	217942_at
								217950_at	217950_at
								217964_at	217964_at
								217967_s_at	217967_s_at
								218022_at	218022_at
								218031_s_at	218031_s_at
								218037_at	218037_at
								218087_s_at	218087_s_at
								218095_s_at	218095_s_at
								218099_at	218099_at
								218149_s_at	218149_s_at
								218151_x_at	218151_x_at
								218217_at	218217_at
								218228_s_at	218228_s_at
								218232_at	218232_at
								218249_at	218249_at
								218271_s_at	218271_s_at
								218322_s_at	218322_s_at
								218336_at	218336_at
								218342_s_at	218342_s_at
								218346_s_at	218346_s_at
								218350_s_at	218350_s_at
								218353_at	218353_at
								218450_at	218450_at
								218454_at	218454_at
								218501_at	218501_at
								218539_at	218539_at
								218546_at	218546_at
								218556_at	218556_at
								218559_s_at	218559_s_at
								218582_at	218582_at
								218603_at	218603_at
								218625_at	218625_at
								218654_s_at	218654_s_at
								218656_s_at	218656_s_at
								218665_at	218665_at
								218694_at	218694_at
								218729_at	218729_at
								218730_s_at	218730_s_at
								218732_at	218732_at
								218736_s_at	218736_s_at
								218763_at	218763_at
								218764_at	218764_at
								218805_at	218805_at
								218845_at	218845_at
								218857_s_at	218857_s_at
								218901_at	218901_at
								218934_s_at	218934_s_at
								218960_at	218960_at
								218973_at	218973_at
								219059_s_at	219059_s_at
								219064_at	219064_at
								219165_at	219165_at
								219213_at	219213_at
								219304_s_at	219304_s_at
								219371_s_at	219371_s_at
								219436_s_at	219436_s_at
								219561_at	219561_at
								219563_at	219563_at
								219598_s_at	219598_s_at
								219666_at	219666_at
								219757_s_at	219757_s_at
								219777_at	219777_at
								219922_s_at	219922_s_at
								219946_x_at	219946_x_at
								220027_s_at	220027_s_at
								220147_s_at	220147_s_at
								220155_s_at	220155_s_at
								220272_at	220272_at
								220532_s_at	220532_s_at
								220607_x_at	220607_x_at
								220765_s_at	220765_s_at
								220911_s_at	220911_s_at
								220949_s_at	220949_s_at
								220952_s_at	220952_s_at
								220975_s_at	220975_s_at
								221019_s_at	221019_s_at
								221031_s_at	221031_s_at
								221223_x_at	221223_x_at
								221427_s_at	221427_s_at
								221447_s_at	221447_s_at
								221493_at	221493_at
								221518_s_at	221518_s_at
								221529_s_at	221529_s_at
								221565_s_at	221565_s_at
								221580_s_at	221580_s_at
								221667_s_at	221667_s_at
								221701_s_at	221701_s_at
								221747_at	221747_at
								221773_at	221773_at
								221817_at	221817_at
								221899_at	221899_at
								221918_at	221918_at
								221927_s_at	221927_s_at
								221942_s_at	221942_s_at
								221966_at	221966_at
								221984_s_at	221984_s_at
								222116_s_at	222116_s_at
								222281_s_at	222281_s_at
								222288_at	222288_at
								222334_at	222334_at
								266_s_at	266_s_at
								32502_at	32502_at
								33323_r_at	33323_r_at
								34206_at	34206_at
								35820_at	35820_at
								36030_at	36030_at
								37145_at	37145_at
								37384_at	37384_at
								38340_at	38340_at
								39817_s_at	39817_s_at
								40016_g_at	40016_g_at
								44146_at	44146_at
								44563_at	44563_at
								45714_at	45714_at
								55616_at	55616_at
								57715_at	57715_at
								61734_at	61734_at
								63825_at	63825_at
								65086_at	65086_at
								201117_s_at
								201187_s_at
								201228_s_at
								201286_at
								201689_s_at
								202035_s_at
								202196_s_at
								202482_x_at
								202498_s_at
								202552_s_at
								202663_at
								202977_s_at
								203023_at
								203086_at
								203141_s_at
								203158_s_at
								203302_at
								203485_at
								203559_s_at
								203603_s_at
								203619_s_at
								203698_s_at
								203705_s_at
								203706_s_at
								203803_at
								203881_s_at
								203901_at
								203908_at
								203946_s_at
								204006_s_at
								204032_at
								204095_s_at
								204110_at
								204176_at
								204236_at
								204270_at
								204527_at
								204591_at
								204642_at
								204665_at
								204717_s_at
								204724_s_at
								204736_s_at
								204796_at
								204799_at
								204859_s_at
								204885_s_at
								204897_at
								204938_s_at
								204940_at
								204959_at
								205005_s_at
								205027_s_at
								205279_s_at
								205411_at
								205414_s_at
								205421_at
								205433_at
								205440_s_at
								205491_s_at
								205501_at
								205531_s_at
								205539_at
								205555_s_at
								205609_at
								205617_at
								205619_s_at
								205659_at
								205700_at
								205709_s_at
								205799_s_at
								205801_s_at
								205844_at
								205860_x_at
								205908_s_at
								205997_at
								206007_at
								206036_s_at
								206043_s_at
								206070_s_at
								206167_s_at
								206201_s_at
								206224_at
								206239_s_at
								206262_at
								206319_s_at
								206345_s_at
								206358_at
								206394_at
								206400_at
								206561_s_at
								206578_at
								206584_at
								206643_at
								206669_at
								206704_at
								206740_x_at
								206785_s_at
								206806_at
								206893_at
								207012_at
								207062_at
								207137_at
								207175_at
								207177_at
								207179_at
								207234_at
								207254_at
								207257_at
								207295_at
								207301_at
								207373_at
								207445_s_at
								207496_at
								207528_s_at
								207545_s_at
								207575_at
								207677_s_at
								207802_at
								207957_s_at
								207996_s_at
								208016_s_at
								208062_s_at
								208201_at
								208291_s_at
								208311_at
								208353_x_at
								208359_s_at
								208381_s_at
								208399_s_at
								208448_x_at
								208470_s_at
								208562_s_at
								208935_s_at
								209211_at
								209307_at
								209606_at
								209613_s_at
								209626_s_at
								209676_at
								209742_s_at
								209754_s_at
								209756_s_at
								209811_at
								210002_at
								210078_s_at
								210108_at
								210198_s_at
								210218_s_at
								210222_s_at
								210375_at
								210507_s_at
								210523_at
								210540_s_at
								210550_s_at
								210559_s_at
								210614_at
								210675_s_at
								210704_at
								210711_at
								210717_at
								210723_x_at
								210730_s_at
								211219_s_at
								211221_at
								211367_s_at
								211368_s_at
								211401_s_at
								211441_x_at
								211451_s_at
								211466_at
								211540_s_at
								211606_at
								211637_x_at
								211659_at
								211734_s_at
								211742_s_at
								211795_s_at
								211798_x_at
								211869_at
								212029_s_at
								212122_at
								212220_at
								212545_s_at
								212592_at
								212681_at
								212886_at
								212989_at
								212990_at
								213094_at
								213167_s_at
								213307_at
								213308_at
								213316_at
								213317_at
								213362_at
								213401_s_at
								213425_at
								213438_at
								213506_at
								213558_at
								213644_at
								213684_s_at
								213719_s_at
								213751_at
								213761_at
								213764_s_at
								213806_at
								213816_s_at
								213817_at
								213896_x_at
								213974_at
								214012_at
								214021_x_at
								214071_at
								214191_at
								214269_at
								214270_s_at
								214307_at
								214318_s_at
								214420_s_at
								214467_at
								214528_s_at
								214533_at
								214551_s_at
								214577_at
								214599_at
								214611_at
								214632_at
								214673_s_at
								214697_s_at
								214770_at
								214913_at
								215124_at
								215188_at
								215237_at
								215264_at
								215272_at
								215303_at
								215314_at
								215321_at
								215388_s_at
								215538_at
								215571_at
								215581_s_at
								215617_at
								215638_at
								215871_at
								215933_s_at
								215998_at
								216100_s_at
								216154_at
								216155_at
								216175_at
								216191_s_at
								216350_s_at
								216370_s_at
								216424_at
								216470_x_at
								216510_x_at
								216534_at
								216543_at
								216638_s_at
								216720_at
								216816_at
								216834_at
								216855_s_at
								216899_s_at
								216905_s_at
								216931_at
								216937_s_at
								217000_at
								217010_s_at
								217112_at
								217172_at
								217182_at
								217212_s_at
								217230_at
								217280_x_at
								217328_at
								217448_s_at
								217471_at
								217475_s_at
								217500_at
								217504_at
								217533_x_at
								217561_at
								217590_s_at
								217639_at
								217666_at
								218087_s_at
								218128_at
								218182_s_at
								218326_s_at
								218657_at
								218668_s_at
								218701_at
								218748_s_at
								219015_s_at
								219017_at
								219087_at
								219181_at
								219209_at
								219295_s_at
								219312_s_at
								219313_at
								219347_at
								219386_s_at
								219450_at
								219501_at
								219513_s_at
								219529_at
								219533_at
								219537_x_at
								219540_at
								219568_x_at
								219580_s_at
								219604_s_at
								219607_s_at
								219694_at
								219778_at
								219850_s_at
								219882_at
								219928_s_at
								219947_at
								219959_at
								219976_at
								220037_s_at
								220038_at
								220057_at
								220064_at
								220100_at
								220102_at
								220122_at
								220159_at
								220170_at
								220191_at
								220276_at
								220297_at
								220312_at
								220322_at
								220330_s_at
								220392_at
								220416_at
								220450_at
								220459_at
								220480_at
								220648_at
								220723_s_at
								220761_s_at
								220806_x_at
								220958_at
								221035_s_at
								221062_at
								221075_s_at
								221088_s_at
								221110_x_at
								221156_x_at
								221160_s_at
								221210_s_at
								221224_s_at
								221245_s_at
								221276_s_at
								221289_at
								221308_at
								221325_at
								221372_s_at
								221384_at
								221393_at
								221444_at
								221577_x_at
								221586_s_at
								221615_at
								221618_s_at
								221634_at
								221796_at
								221909_at
								222043_at
								222062_at
								222156_x_at
								222262_s_at
								222291_at
								222292_at
								222312_s_at
								222379_at
								35148_at
								35974_at
								37079_at
								37512_at
								37986_at
								38241_at
								40284_at
								41577_at
								47553_at
								57540_at

## Sheet: GSE17504
Welch's t-test results				CASh 0.01 results				CASh 0.05 results
all	up	down		all	up	down		all	up	down
0	0	0		7915787	7915787	7894333		7892967	7892967	7892532
				7980438	7980438	7946321		7895677	7895677	7892604
				8033118	8033118	7989193		7900030	7900030	7893320
				8060988	8060988	8020357		7901746	7901746	7893433
				8080781	8080781	8136961		7915787	7915787	7893996
				8082314	8082314	8176832		7916493	7916493	7894718
				8139488	8139488	8176878		7936567	7936567	7895108
				8141791	8141791	8177354		7944722	7944722	7895311
				8180353	8180353			7946516	7946516	7895524
				7894333				7950555	7950555	7896083
				7946321				7953135	7953135	7896317
				7989193				7957126	7957126	7908492
				8020357				7960947	7960947	7910383
				8136961				7969861	7969861	7917902
				8176832				7976073	7976073	7944718
				8176878				7980438	7980438	8003859
				8177354				7986411	7986411	8045347
								7989199	7989199	8073680
								7992463	7992463	8082261
								7993071	7993071	8100131
								8006433	8006433	8102829
								8027169	8027169	8103561
								8029710	8029710	8112045
								8041383	8041383	8120184
								8046906	8046906	8124335
								8048595	8048595	8132343
								8060988	8060988	8139031
								8080781	8080781	8152376
								8080810	8080810	8154295
								8082314	8082314	8157231
								8086008	8086008	8157671
								8090133	8090133	8162938
								8090898	8090898	8175315
								8092970	8092970
								8112961	8112961
								8119161	8119161
								8122773	8122773
								8123274	8123274
								8124531	8124531
								8129677	8129677
								8132860	8132860
								8139488	8139488
								8141016	8141016
								8141829	8141829
								8150428	8150428
								8150491	8150491
								8157691	8157691
								8162147	8162147
								8169009	8169009
								8180353	8180353
								8180354	8180354
								7892532
								7892604
								7893320
								7893433
								7893996
								7894718
								7895108
								7895311
								7895524
								7896083
								7896317
								7908492
								7910383
								7917902
								7944718
								8003859
								8045347
								8073680
								8082261
								8100131
								8102829
								8103561
								8112045
								8120184
								8124335
								8132343
								8139031
								8152376
								8154295
								8157231
								8157671
								8162938
								8175315

## Sheet: GSE12814
Welch's t-test results				CASh 0.01 results				CASh 0.05 results
all	up	down		all	up	down		all	up	down
0	0	0		1555847_a_at	1555847_a_at	1555538_s_at		1556060_a_at	1556060_a_at	1553137_s_at
				203518_at	203518_at	201689_s_at		201325_s_at	201325_s_at	1553313_s_at
				207549_x_at	207549_x_at	210335_at		202235_at	202235_at	1555212_at
				207980_s_at	207980_s_at	210665_at		202286_s_at	202286_s_at	1558356_at
				208922_s_at	208922_s_at	219740_at		202804_at	202804_at	1559332_at
				211574_s_at	211574_s_at	220065_at		203130_s_at	203130_s_at	1561341_at
				212658_at	212658_at	228197_at		203698_s_at	203698_s_at	1561589_a_at
				213258_at	213258_at	239710_at		204243_at	204243_at	1563075_s_at
				217889_s_at	217889_s_at			204866_at	204866_at	1564598_a_at
				218684_at	218684_at			205726_at	205726_at	1566664_at
				223058_at	223058_at			207016_s_at	207016_s_at	201688_s_at
				224675_at	224675_at			207549_x_at	207549_x_at	205338_s_at
				228176_at	228176_at			207977_s_at	207977_s_at	206276_at
				1555538_s_at				208960_s_at	208960_s_at	208032_s_at
				201689_s_at				210198_s_at	210198_s_at	208102_s_at
				210335_at				211574_s_at	211574_s_at	209686_at
				210665_at				212658_at	212658_at	210258_at
				219740_at				212923_s_at	212923_s_at	210882_s_at
				220065_at				213071_at	213071_at	211909_x_at
				228197_at				213258_at	213258_at	213231_at
				239710_at				214078_at	214078_at	214111_at
								217889_s_at	217889_s_at	216120_s_at
								219167_at	219167_at	216639_at
								219454_at	219454_at	219728_at
								221245_s_at	221245_s_at	219921_s_at
								221447_s_at	221447_s_at	221015_s_at
								221841_s_at	221841_s_at	222456_s_at
								223081_at	223081_at	224013_s_at
								223894_s_at	223894_s_at	228113_at
								224474_x_at	224474_x_at	228143_at
								224990_at	224990_at	230081_at
								225241_at	225241_at	230442_at
								225325_at	225325_at	231196_x_at
								225603_s_at	225603_s_at	231297_at
								227524_at	227524_at	232499_at
								233520_s_at	233520_s_at	233388_at
								236277_at	236277_at	233976_at
								238604_at	238604_at	235343_at
								243864_at	243864_at	235549_at
								1553137_s_at		236738_at
								1553313_s_at		238445_x_at
								1555212_at		238934_at
								1558356_at		239429_at
								1559332_at		241008_at
								1561341_at		244061_at
								1561589_a_at
								1563075_s_at
								1564598_a_at
								1566664_at
								201688_s_at
								205338_s_at
								206276_at
								208032_s_at
								208102_s_at
								209686_at
								210258_at
								210882_s_at
								211909_x_at
								213231_at
								214111_at
								216120_s_at
								216639_at
								219728_at
								219921_s_at
								221015_s_at
								222456_s_at
								224013_s_at
								228113_at
								228143_at
								230081_at
								230442_at
								231196_x_at
								231297_at
								232499_at
								233388_at
								233976_at
								235343_at
								235549_at
								236738_at
								238445_x_at
								238934_at
								239429_at
								241008_at
								244061_at

## Sheet: GSE23112
Welch's t-test results				CASh 0.01 results				CASh 0.05 results
all	up	down		all	up	down		all	up	down
0	0	0		201952_at	201952_at	209914_s_at		201487_at	201487_at	205501_at
				202437_s_at	202437_s_at			201580_s_at	201580_s_at	206030_at
				203529_at	203529_at			201596_x_at	201596_x_at	215131_at
				211074_at	211074_at			201687_s_at	201687_s_at	215444_s_at
				211663_x_at	211663_x_at			202465_at	202465_at	216074_x_at
				221267_s_at	221267_s_at			203299_s_at	203299_s_at	216831_s_at
				209914_s_at				203335_at	203335_at	219681_s_at
								203556_at	203556_at
								203853_s_at	203853_s_at
								204964_s_at	204964_s_at
								205347_s_at	205347_s_at
								205445_at	205445_at
								208651_x_at	208651_x_at
								209505_at	209505_at
								209655_s_at	209655_s_at
								209747_at	209747_at
								210511_s_at	210511_s_at
								211663_x_at	211663_x_at
								212013_at	212013_at
								212367_at	212367_at
								212899_at	212899_at
								213039_at	213039_at
								214348_at	214348_at
								215418_at	215418_at
								217025_s_at	217025_s_at
								217812_at	217812_at
								217815_at	217815_at
								217838_s_at	217838_s_at
								218093_s_at	218093_s_at
								219371_s_at	219371_s_at
								219855_at	219855_at
								205501_at
								206030_at
								215131_at
								215444_s_at
								216074_x_at
								216831_s_at
								219681_s_at
